# Supplementary material
Source: PubMed Central journal article supplement (PMC4323854)
Supplement: NIHMS646387-supplement-441_2014_2040_MOESM1_ESM.pdf [file NIHMS646387-supplement-441_2014_2040_MOESM1_ESM.pdf]

| <b>Sequence name</b>    | <b>Accession number</b> |
|-------------------------|-------------------------|
| H. sapiens Pou3f3       | NM_006236               |
| R. norvegicus Pou3f3    | NM_138837               |
| D. rerio Pou3f3a        | NM_131150               |
| X. tropicalis Pouf34    | NM_001097259            |
| E. caballus Pou3f4      | NM_001257184            |
| R. norvegicus Pou3f4    | NM_017252               |
| T. rubes Pou3f2         | XM_003965889            |
| H. sapiens Pou3f2       | NM_005604               |
| M. musculus Pou3f2      | NM_008899               |
| D. rerio Pou3f1         | NM_131161               |
| H. sapiens Pou3f1       | NM_002699               |
| M. musculus Pou3f1      | NM_011141               |
| D. rerio Pou4f3         | NM_131278               |
| M. musculus Pou4f3      | NM_138945               |
| H. sapiens Pou5f1       | NM_002701               |
| M. musculus Pou5f1      | NM_013633               |
| X. laevis Pou5f3.1      | NM_001087873            |
| D. rerio Pou5f3         | NM_131112               |
| P. lividus Oct1/2       | GU270855                |
| H. glaberrima Oct1/2/11 | KM281938                |
| C. gigas Pou2f1         | JH816020                |
| G. gallus Pou2f3        | XM_425799               |
| M. musculus Pou2f3      | NM_011139               |
| X. tropicalis Pou2f3    | XM_002935021            |
| H. sapiens Pou2f1       | AY113189                |
| S. scrofa Pou2f1        | NM_214040               |
| X. tropicalis Pou2f1    | NM_001016337            |
| H. sapiens Pou2f2       | XM_005259011            |
| M. musculus Pou2f2      | NM_001163556            |
| S. scrofa Pou2f2        | NM_214040               |
| D. rerio Pou6f1         | NM_131113               |
| M. musculus Pou6f1      | NM_010127               |
| M. musculus S-myc       | NM_010850               |
| R. norvegicus S-myc     | M29069                  |
| M. musculus N-myc       | X03919                  |
| G. gallus N-myc         | D90071                  |
| X. laevis N-myc         | X58670                  |
| D. rerio N-myc          | NM_212614               |
| X. laevis L-myc         | L11363                  |
| H. sapiens L-myc        | M19720                  |
| M. musculus L-myc       | X13945                  |
| C. auratus C-myc        | AB040746                |
| C. carpio C-myc         | D37887                  |
| D. rerio C-myc          | L11710                  |
| X. laevis C-myc         | M14455                  |
| G. gallus C-myc         | J00889                  |
| P. troglodytes C-myc    | M38057                  |

|                         |              |
|-------------------------|--------------|
| R. norvegicus C-myc     | Y00396       |
| B. belcheri myc         | AB175932     |
| C. intestinalis myc     | NM_001078299 |
| S. purpuratus myc       | L37056       |
| A. vulgaris C-myc       | M80364       |
| H. glaberrima Myc       | KM281937     |
|                         |              |
| H. sapiens Klf12        | NM_007249    |
| M. musculus Klf12       | Y14295       |
| H. sapiens Klf8         | U28282       |
| M. musculus Klf8        | AK044185     |
| H. sapiens Klf3         | AB024523     |
| M. musculus Klf3        | U36340       |
| H. sapiens Klf5         | AF132818     |
| M. musculus Klf5        | AF079852     |
| H. sapiens Klf6         | BC000311     |
| R. norvegicus Klf6      | AF001417     |
| H. sapiens Klf7         | AB015132     |
| M. musculus Klf7        | AF338369     |
| H. glaberrima Klf1/2/4  | KM281936     |
| H. sapiens Klf1         | U37106       |
| M. musculus Klf1        | M97200       |
| H. sapiens Klf2         | BC071983     |
| M. musculus Klf2        | U25096       |
| H. sapiens Klf4         | AF022184     |
| M. musculus Klf4        | U20344       |
| D. rerio Sp9            | NM_212960    |
|                         |              |
| H. sapiens Sox1         | Y13436       |
| M. musculus Sox1        | X94126       |
| G. gallus Sox1          | NM_204333    |
| D. rerio Sox1a          | NM_001002483 |
| G. gallus Sox2          | NM_205188    |
| H. sapiens Sox2         | NM_003106    |
| M. musculus Sox2        | NM_011443    |
| D. rerio Sox3           | NM_001001811 |
| H. sapiens Sox3         | X71135       |
| M. musculus Sox3        | X94125       |
| H. glaberrima SoxB1     | KM281939     |
| S. kowalevskii Sox1/2/3 | NM_001164905 |
| S. purpuratus SoxB1     | NM_214474    |
| H. erythrogramma SoxB1  | AY532155     |
| H. tuberculata SoxB1    | AY532156     |
| H. sapiens SRY          | X53772       |
| E. caballus SRY         | NM_001081810 |
| H. sapiens Sox14        | NM_004189    |
| M. musculus Sox14       | AF193437     |
| D. rerio Sox14          | NM_001037680 |

|                                 |           |
|---------------------------------|-----------|
| G. gallus Sox21                 | AB026623  |
| H. sapiens Sox21                | NM_007084 |
| M. musculus Sox21               | NM_177753 |
| D. melanogaster Sox (fish hook) | DMU68056  |
| H. sapiens Sox15                | AB006867  |
| M. musculus Sox15               | AB014474  |
| H. sapiens Sox4                 | X70683    |
| M. musculus Sox4                | X70298    |
| H. sapiens Sox11                | U23752    |
| M. musculus Sox11               | AF009414  |
| R. norvegicus Sox11             | AJ004858  |
| H. sapiens Sox17                | AB073988  |
| M. musculus Sox17               | D49474    |
| X. tropicalis Sox17a            | NM_204094 |
| H. sapiens Sox7                 | AJ409320  |
| M. musculus Sox7                | AB023419  |
| H. sapiens Sox8                 | NM_014587 |
| M. musculus Sox8                | NM_011447 |
| H. sapiens Sox9                 | NM_000346 |
| M. musculus Sox9                | NM_011448 |
| G. gallus Sox10                 | AF152356  |
| H. sapiens Sox10                | AJ001183  |
| R. norvegicus Sox10             | AJ001029  |
