# Supplementary material
Source: PubMed Central journal article supplement (PMC4323854)
Supplement: NIHMS646387-supplement-441_2014_2040_MOESM2_ESM.pdf [file NIHMS646387-supplement-441_2014_2040_MOESM2_ESM.pdf]

| Primers for qPCR  |                          |                          |
|-------------------|--------------------------|--------------------------|
| Target transcript | Forward primer (5' → 3') | Reverse primer (5' → 3') |
| Klf1/2/4          | GCCTCACATGAGCCTCCTGAC    | GGTGAATTACTGCGTTGTTCTC   |
| Myc               | CCTACAGCCGTCTTTCCATACC   | TCCCTGCCATACTGAGATCCA    |
| Oct1/2/11         | TCAGGGTTGCTTTGGAGAAGAG   | GGCAGCATCATAGAGGGAGGAT   |
| SoxB1             | GTGCCATTTGCCTTCTCTTACC   | GAGTCCACAGCCCATCGTTTC    |
| Atp6l             | CGGAGCAGGACTTAGTGTCG     | TTCCAACAAACAAACGAGGCT    |
| Eef2              | TGAAGGTCCACGAGACGATCC    | CAGAGAAGACACGACCAAAGGC   |
| NADH              | CAATGGTTGTTGCTGGAGTCTTT  | CGCAGAAGTAGCCGCGAATAT    |
| rpL18a            | AACAAGGAGACCAGCTACCAACT  | ATGTAATTCCAACCCACTTTCAGG |
| Sod               | CTCACTAAGCCCTGAAACGACA   | ACGGTTCTTCGCTTTCTACTTCA  |

**PCR primers used to generate riboprobe templates\***

|           |                                                                              |                                                                     |
|-----------|------------------------------------------------------------------------------|---------------------------------------------------------------------|
| Klf1/2/4  | gaaat <b>ATTTAGGTGACACTATAGAAG</b><br><b>ATTCACCACCTCCCCAGTTC</b>            | gaaat <b>TAATACGACTCACTATAGGGA</b><br><b>GAACTTCCAGCCACAGCCCTT</b>  |
| Myc       | gaaat <b>ATTTAGGTGACACTATAGAAG</b><br><b>GCTCTACAGAAAAGGGA</b> <b>ACTTGA</b> | gaaat <b>TAATACGACTCACTATAGGGA</b><br><b>AGTTTCATTATTCCCGAGTGTC</b> |
| Oct1/2/11 | gaaat <b>ATTTAGGTGACACTATAGAAG</b><br><b>GATTTGGAGGAGTTGGAACAG</b>           | gaaat <b>TAATACGACTCACTATAGGGA</b><br><b>GAGCAGCATCATAGAGGGAGGA</b> |
| SoxB1     | gaaat <b>ATTTAGGTGACACTATAGAAG</b><br><b>ACTTCACATCCAGCATACTCA</b>           | gaaat <b>TAATACGACTCACTATAGGGA</b><br><b>GAGTCGTTCCGAACATCACCT</b>  |

\*These primers include: a 5'-nucleotides leader sequence (gaaat); T7 or Sp6 protmoters (red) in forward and reverse primers, respectively; and a gene-specific region (blue)
