# Supplementary material
Source: PubMed Central journal article supplement (PMC4323854)
Supplement: NIHMS646387-supplement-441_2014_2040_MOESM3_ESM.pdf [file NIHMS646387-supplement-441_2014_2040_MOESM3_ESM.pdf]

## Klf1/2/4

difference

| pvalue  | control    | day14       | day21        | day3      | day7      |
|---------|------------|-------------|--------------|-----------|-----------|
| control | NA         | -0.09814737 | -1.409598658 | 0.3644661 | 0.6810510 |
| day14   | 0.89308957 | NA          | -1.311451290 | 0.4626135 | 0.7791983 |
| day21   | 0.05167368 | 0.07940201  | NA           | 1.7740648 | 2.0906496 |
| day3    | 0.63008027 | 0.53280787  | 0.015793740  | NA        | 0.3165849 |
| day7    | 0.36424693 | 0.29089370  | 0.003307012  | 0.6798962 | NA        |

## Myc

difference

| pvalue  | control     | day14         | day21         | day3         | day7       |
|---------|-------------|---------------|---------------|--------------|------------|
| control | NA          | -0.4114596044 | -1.377427e+00 | 1.5798907531 | -0.3845983 |
| day14   | 0.466193656 | NA            | -9.659675e-01 | 1.9913503575 | 0.0268613  |
| day21   | 0.011112870 | 0.0919270861  | NA            | 2.9573179003 | 0.9928288  |
| day3    | 0.005417928 | 0.0004421706  | 1.326637e-07  | NA           | -1.9644891 |
| day7    | 0.491370013 | 0.9613791447  | 7.055566e-02  | 0.0006858113 | NA         |

## Oct1/2/11

difference

| pvalue  | control   | day14       | day21       | day3       | day7        |
|---------|-----------|-------------|-------------|------------|-------------|
| control | NA        | -0.02013705 | -0.55159713 | 0.62289980 | -0.64394898 |
| day14   | 0.9730655 | NA          | -0.53146009 | 0.64303684 | -0.62381193 |
| day21   | 0.3595778 | 0.37483811  | NA          | 1.17449693 | -0.09235184 |
| day3    | 0.2678155 | 0.26930245  | 0.04592606  | NA         | -1.26684877 |
| day7    | 0.2854838 | 0.30081335  | 0.87763528  | 0.02899372 | NA          |

## SoxB1

difference

| pvalue  | control      | day14         | day21         | day3          | day7      |
|---------|--------------|---------------|---------------|---------------|-----------|
| control | NA           | -0.2511678319 | -0.0113789147 | -1.026799e+01 | -3.747144 |
| day14   | 0.8061896289 | NA            | 0.2397889172  | -1.001682e+01 | -3.495976 |
| day21   | 0.9912275831 | 0.8170579370  | NA            | -1.025661e+01 | -3.735765 |
| day3    | 0.0000000000 | 0.0000000000  | 0.0000000000  | NA            | 6.520844  |
| day7    | 0.0001736307 | 0.0005190131  | 0.0003296205  | 8.895240e-11  | NA        |
