# Supplementary material
Source: PubMed Central journal article supplement (PMC4323854)
Supplement: NIHMS646387-supplement-441_2014_2040_MOESM4_ESM.pdf [file NIHMS646387-supplement-441_2014_2040_MOESM4_ESM.pdf]

## Klf1/2/4/

difference

| pvalue  | control   | day12     | day2       | day20       | day6      |
|---------|-----------|-----------|------------|-------------|-----------|
| control | NA        | 0.5130088 | -0.1511364 | -0.24639245 | 0.8665843 |
| day12   | 0.5042954 | NA        | -0.6641452 | -0.75940124 | 0.3535756 |
| day2    | 0.8452157 | 0.3769634 | NA         | -0.09525605 | 1.0177207 |
| day20   | 0.7526153 | 0.3260449 | 0.9020996  | NA          | 1.1129768 |
| day6    | 0.2482636 | 0.6228548 | 0.1692121  | 0.13847608  | NA        |

## Myc

difference

| pvalue  | control      | day12        | day2          | day20         | day6      |
|---------|--------------|--------------|---------------|---------------|-----------|
| control | NA           | 3.104406e+00 | 2.3873979532  | 1.712319e+00  | 3.2824542 |
| day12   | 0.000000e+00 | NA           | -0.7170079172 | -1.392087e+00 | 0.1780484 |
| day2    | 0.000000e+00 | 8.054877e-03 | NA            | -6.750794e-01 | 0.8950563 |
| day20   | 5.097898e-10 | 6.142611e-07 | 0.0140696749  | NA            | 1.5701357 |
| day6    | 0.000000e+00 | 4.958647e-01 | 0.0008011008  | 1.285961e-08  | NA        |

## Oct1/2/11

difference

| pvalue  | control     | day12       | day2        | day20      | day6       |
|---------|-------------|-------------|-------------|------------|------------|
| control | NA          | -0.71931537 | -0.14974740 | -0.6519903 | -0.3463517 |
| day12   | 0.006623574 | NA          | 0.56956797  | 0.0673251  | 0.3729637  |
| day2    | 0.578857069 | 0.02998776  | NA          | -0.5022429 | -0.1966043 |
| day20   | 0.012957739 | 0.79102100  | 0.05722882  | NA         | 0.3056386  |
| day6    | 0.211930735 | 0.15362487  | 0.46105948  | 0.2308570  | NA         |

## SoxB1

difference

| pvalue  | control     | day12        | day2        | day20         | day6        |
|---------|-------------|--------------|-------------|---------------|-------------|
| control | NA          | 0.2542656566 | -0.19057586 | -0.6909167275 | 0.258504604 |
| day12   | 0.285505835 | NA           | -0.44484152 | -0.9451823840 | 0.004238947 |
| day2    | 0.435663434 | 0.0618769741 | NA          | -0.5003408664 | 0.449080465 |
| day20   | 0.004468938 | 0.0001026343 | 0.04629140  | NA            | 0.949421331 |
| day6    | 0.297730030 | 0.9866447659 | 0.06212331  | 0.0001133402  | NA          |
